# Supplementary material for: Adjacent positioning of cellular structures enabled by a Cdc42 GTPase-activating protein–mediated zone of inhibition
Source: PubMed Central journal article supplement — J Cell Biol. 2007 Dec 31;179(7):1375–84. doi: 10.1083/jcb.200705160 (PMC2373499; doi:10.1083/jcb.200705160), 2007-12-31
Supplement: jcellbiol_jcb.200705160_7.pdf [file jcellbiol_jcb.200705160_7.pdf]

Table S1. **Yeast strains used in this study**

| Strain  | Genotype                                                                                                                                                         | Source                  |
|---------|------------------------------------------------------------------------------------------------------------------------------------------------------------------|-------------------------|
| YEF473  | $\alpha/\varnothing$ <i>his3/his3 leu2/leu2 lys2lys2 trp1/trp1 ura3/ura3</i>                                                                                     | Bi and Pringle, 1996    |
| YEF473A | <i>a his3 leu2 lys2 trp1 ura3</i>                                                                                                                                | Bi and Pringle, 1996    |
| YEF473B | $\varnothing$ <i>his3 leu2 lys2 trp1 ura3</i>                                                                                                                    | Bi et al., 2000         |
| YEF1233 | As YEF473 except <i>rga1</i> $\varnothing$ :: <i>HIS3/rga1</i> $\varnothing$ :: <i>HIS3</i>                                                                      | This study <sup>a</sup> |
| YEF2324 | As YEF473A except <i>rga1</i> $\varnothing$ :: <i>HIS3</i>                                                                                                       | This study <sup>b</sup> |
| YEF2380 | As YEF473A except <i>rga1</i> $\varnothing$ :: <i>HIS3 rga2</i> $\varnothing$ :: <i>KanMX6 bem3</i> $\varnothing$ :: <i>TRP1</i>                                 | Caviston et al., 2003   |
| YEF2392 | As YEF473A except <i>rga2</i> $\varnothing$ :: <i>KanMX6 bem3</i> $\varnothing$ :: <i>TRP1</i>                                                                   | This study <sup>b</sup> |
| YEF2921 | As YEF473A <i>cdc42</i> <sup>V36G</sup>                                                                                                                          | Caviston et al., 2003   |
| YEF4723 | As YEF473A except <i>SHS1-GFP:LEU2 SPC42-GFP:KanMX6 GIC2-PBD-RFP:URA3</i>                                                                                        | This study <sup>c</sup> |
| YEF4934 | <i>a cdc24-4 swe1</i> $\varnothing$ :: <i>TRP1 SHS1-GFP:LEU2 SPC42-GFP:KanMX6 GIC2-PBD-RFP:URA3 his3 leu2 trp1 ura3</i>                                          | This study <sup>c</sup> |
| LRsY359 | As YEF473B except <i>rsr1</i> $\varnothing$ :: <i>TRP1</i>                                                                                                       | Pringle, 1991           |
| AM100   | As YEF473B except <i>bud3</i> $\varnothing$ :: <i>HIS3</i>                                                                                                       | Pringle, 1991           |
| YZT55   | As YEF473A except <i>rga1</i> $\varnothing$ :: <i>HIS3 CDC3-GFP:URA3</i>                                                                                         | This study <sup>d</sup> |
| YZT82   | As YEF473A except <i>CDC3-GFP:URA3</i>                                                                                                                           | This study <sup>d</sup> |
| YZT88   | As YEF473A <i>rga1</i> $\varnothing$ :: <i>URA3-KanMX6</i>                                                                                                       | This study <sup>e</sup> |
| YZT111  | As YEF473A except <i>rga2</i> $\varnothing$ :: <i>KanMX6 bem3</i> $\varnothing$ :: <i>TRP1 CDC3-GFP:URA3</i>                                                     | This study <sup>d</sup> |
| YZT139  | As YEF473A except <i>rga1</i> $\varnothing$ :: <i>HIS3 rsr1</i> $\varnothing$ :: <i>TRP1</i>                                                                     | This study <sup>f</sup> |
| YZT146  | As YEF473A except <i>rga1</i> $\varnothing$ :: <i>HIS3 bud3</i> $\varnothing$ :: <i>HIS3</i>                                                                     | This study <sup>g</sup> |
| YZT156  | As YEF473 except <i>GFP-RGA1/rga1</i> $\varnothing$ :: <i>HIS3</i>                                                                                               | This study <sup>h</sup> |
| YZT158  | As YEF473A except <i>GFP-RGA1</i>                                                                                                                                | This study <sup>i</sup> |
| YZT166  | As YEF473 except <i>CDC3-mCherry-SpHIS5/CDC3</i>                                                                                                                 | This study <sup>i</sup> |
| YZT194  | As YEF473A except <i>HA-RGA1</i>                                                                                                                                 | This study <sup>k</sup> |
| YZT195  | As YEF473A except <i>HA-rga1</i> <sup>R829A</sup>                                                                                                                | This study <sup>k</sup> |
| YZT198  | As YEF473A except <i>HA-rga1</i> <sup>R829A</sup> <i>CDC3-GFP:URA3</i>                                                                                           | This study <sup>d</sup> |
| YZT211  | As YEF473 except <i>GFP-RGA1/GFP-RGA1 CDC3-DsRed:LEU2/CDC3</i>                                                                                                   | This study <sup>l</sup> |
| YZT221  | As YEF473 except <i>cdc42</i> $\varnothing$ :: <i>HIS3/cdc42</i> $\varnothing$ :: <i>HIS3 ura3:CDC42-GFP:URA3/CDC42-GFP:URA3 CDC3-DsRed:LEU2/CDC3</i>            | This study <sup>m</sup> |
| YZT232  | As YEF473A except <i>GFP-rga1</i> <sup>700-1007aa</sup> : <i>URA3 rga1</i> $\varnothing$ :: <i>HIS3</i>                                                          | This study <sup>k</sup> |
| YZT240  | As YEF473A except <i>rga1</i> $\varnothing$ :: <i>HIS3 BUD3-rga1</i> <sup>700-1007aa</sup> : <i>GFP:URA3 CDC3-mCherry:LEU2</i>                                   | This study <sup>n</sup> |
| YZT241  | As YEF473A except <i>rga1</i> $\varnothing$ :: <i>HIS3 CYK3-rga1</i> <sup>700-1007aa</sup> : <i>GFP:URA3 CDC3-mCherry:LEU2</i>                                   | This study <sup>n</sup> |
| YZT278  | As YEF473A except <i>rga1</i> $\varnothing$ :: <i>HIS3 BUD3-rga2</i> <sup>712-1009aa</sup> : <i>GFP:URA3 CDC3-mCherry:LEU2</i>                                   | This study <sup>n</sup> |
| YZT283  | As YEF473A except <i>rga1</i> $\varnothing$ :: <i>HIS3 MLC2-GFP:URA3</i>                                                                                         | This study <sup>k</sup> |
| YZT284  | As YEF473A except <i>rga1</i> $\varnothing$ :: <i>HIS3 MLC2-rga1</i> <sup>700-1007aa</sup> : <i>GFP:URA3</i>                                                     | This study <sup>k</sup> |
| YZT292  | As YEF473A except <i>CDC3-GFP:LEU2 GIC2-PBD-RFP::URA3</i>                                                                                                        | This study <sup>o</sup> |
| YZT293  | As YEF473A except <i>rga1</i> $\varnothing$ :: <i>HIS3 CDC3-GFP:LEU2 GIC2-PBD-RFP::URA3</i>                                                                      | This study <sup>o</sup> |
| YZT294  | As YEF473A except <i>rga2</i> $\varnothing$ :: <i>KanMX6 bem3</i> $\varnothing$ :: <i>TRP1 CDC3-GFP:LEU2 GIC2-PBD-RFP::URA3</i>                                  | This study <sup>o</sup> |
| YZT295  | s YEF473A except <i>rga1</i> $\varnothing$ :: <i>HIS3 rga2</i> $\varnothing$ :: <i>KanMX6 bem3</i> $\varnothing$ :: <i>TRP1 CDC3-GFP:LEU2 GIC2-PBD-RFP::URA3</i> | This study <sup>o</sup> |
| JGY1621 | As YEF473A except <i>rga1</i> $\varnothing$ :: <i>HIS3 BUD3-GFP:URA3</i>                                                                                         | This study <sup>k</sup> |
| JGY1622 | As YEF473A except <i>rga1</i> $\varnothing$ :: <i>HIS3 BUD3-rga1</i> <sup>700-1007aa</sup> : <i>GFP:URA3</i>                                                     | This study <sup>k</sup> |
| JGY1639 | As YEF473A except <i>rga1</i> $\varnothing$ :: <i>HIS3 BUD3-rga1</i> <sup>700-1007aa,R829A</sup> : <i>GFP:URA3</i>                                               | This study <sup>k</sup> |
| JGY1641 | As YEF473A except <i>rga1</i> $\varnothing$ :: <i>HIS3 BUD3-rga2</i> <sup>712-1009aa</sup> : <i>GFP:URA3</i>                                                     | This study <sup>k</sup> |
| JGY1642 | As YEF473A except <i>rga1</i> $\varnothing$ :: <i>HIS3 BUD3-bem3</i> <sup>318-1128aa</sup> : <i>GFP:URA3</i>                                                     | This study <sup>k</sup> |
| JGY1644 | As YEF473A except <i>rga1</i> $\varnothing$ :: <i>HIS3 CYK3-GFP:URA3</i>                                                                                         | This study <sup>k</sup> |
| JGY1645 | As YEF473A except <i>rga1</i> $\varnothing$ :: <i>HIS3 CYK3-rga1</i> <sup>700-1007aa</sup> : <i>GFP:URA3</i>                                                     | This study <sup>k</sup> |

Bi, E., and J.R. Pringle. 1996. ZDS1 and ZDS2, genes whose products may regulate Cdc42p in *Saccharomyces cerevisiae*. *Mol. Cell. Biol.* 16:5264–5275.

Bi, E., J.B. Chiavetta, H. Chen, G.-C. Chen, C.S.M. Chan, and J.R. Pringle. 2000. Identification of novel, evolutionarily conserved Cdc42p-interacting proteins and of redundant pathways linking Cdc24p and Cdc42p to actin polarization in yeast. *Mol. Biol. Cell.* 11:773–793.

Caviston, J.P., M. Longtine, J.R. Pringle, and E. Bi. 2003. The role of Cdc42p GTPase-activating proteins in assembly of the septin ring in yeast. *Mol. Biol. Cell.* 14:4051–4066.

Iwase, M., J. Luo, S. Nagaraj, M. Longtine, H.B. Kim, B.K. Haarer, C. Caruso, Z. Tong, J.R. Pringle, and E. Bi. 2006. Role of a Cdc42p effector pathway in recruitment of the yeast septins to the presumptive bud site. *Mol. Biol. Cell.* 17:1110–1125

Pringle, J.R. 1991. Staining of bud scars and other cell wall chitin with Calcofluor. *Methods Enzymol.* 194:732–735.

<sup>a</sup>YEF1233 is generated by crossing YEF1002 (a *rga1*  $\varnothing$ ::*HIS3*) to YEF1000 ( $\varnothing$  *rga1*  $\varnothing$ ::*HIS3*) (Bi et al., 2000).

<sup>b</sup>A segregant of YEF2318 (Caviston et al., 2003).

<sup>c</sup>Plasmid Ylp211-GIC2-PBD-RFP was digested with Apal and integrated at the *ura3* locus of Masa1223 (as YEF473A except *SHS1-GFP:LEU2 SPC42-*

*GFP::KanMX6*; constructed in the Bi laboratory) and Masa1246 (Iwase et al., 2006) to generate YEF4723 and YEF4934.

<sup>4</sup>Plasmid Ylp211-CDC3-GFP (integrative, *URA3*; Caviston et al., 2003) was digested with *SpeI* and integrated at the *CDC3* locus of YEF2324, YEF473A, YEF2392, and YZT195 to generate YZT55, YZT82, YZT111, and YZT198.

<sup>5</sup>*URA3-KanMX6* was amplified from strain Masa1243 (a *myo1 $\Delta$ ::URA3-KanMX6*; constructed in Bi laboratory) by a pair of primers containing *RGA1*-flanking sequences and the resulting PCR product was transformed into YEF2324, selecting for Ura<sup>+</sup>Kan<sup>r</sup> His<sup>+</sup> to yield YZT88.

<sup>6</sup>A segregant from the diploid strain generated by crossing YEF2324 to LRSy359.

<sup>7</sup>A segregant from the diploid strain generated by crossing YEF2324 to AM100.

<sup>8</sup>HindIII-digested plasmid pRS315-GFP-RGA1 (Caviston et al., 2003) was transformed into YZT88 to replace *rga1 $\Delta$ ::URA3-KanMX6* with *GFP-RGA1* by selecting for Ura<sup>-</sup> Kan<sup>r</sup> GFP<sup>+</sup> colonies. The resulting strain (a *GFP-RGA1*) was crossed to YEF2325 ( $\otimes$  *rga1 $\Delta$ ::HIS3*), which is a segregant of YEF2318 (Caviston et al., 2003), to generate YZT156.

<sup>9</sup>A segregant of YZT156.

<sup>10</sup>JGY1326 (a *CDC3-mCherry-SpHIS5*; Iwase et al., 2006) was crossed to YEF473B to generate YZT166.

<sup>11</sup>See description in Materials and methods.

<sup>12</sup>Two segregants of opposite mating types carrying *GFP-RGA1* from YZT156 were crossed to form a diploid strain, which was then transformed with *SpeI*-digested Ylp128-CDC3-DsRed for the integration of the plasmid at the *CDC3* locus to yield YZT211.

<sup>13</sup>YEF1517 (a *cdc42 $\Delta$ ::HIS3 ura3::CDC42-GFP:URA3*; Bi et al., 2000) carrying pRS314 (*CEN, TRP1*) was crossed to YEF1518 ( $\otimes$  *cdc42 $\Delta$ ::HIS3 ura3::CDC42-GFP:URA3*; Bi et al., 2000) carrying pRS315 (*CEN LEU2*) to generate diploids. The resulting strain, after losing both plasmids, was transformed with *SpeI*-digested Ylp128-CDC3-DsRed for the integration of the plasmid at the *CDC3* locus to yield YZT221.

<sup>14</sup>Plasmid Ylp128-CDC3-mCherry (integrative, *LEU2*) was digested with *SpeI* and integrated at the *CDC3* locus of JGY1622, JGY1645, and JGY1641 to yield YZT240, YZT241, and YZT278, respectively.

<sup>15</sup>Yeast strains YZT292, YZT293, YZT294, and YZT295 were constructed by integrating *BglII*-digested Ylp128-CDC3-GFP (integrative, *LEU2*) and *Apal*-digested Ylp211-GIC2-PBD-RFP (integrative, *URA3*) into strains YEF473A (wild type), YEF2324 (*rga1 $\Delta$ ::HIS3*), YEF2392 (*rga2 $\Delta$ ::KanMX6 bem3 $\Delta$ ::TRP1*), and YEF2380 (*rga1 $\Delta$ ::HIS3 rga2 $\Delta$ ::KanMX6 bem3 $\Delta$ ::TRP1*), respectively.
